# Supplementary material
Source: publisher site journal article supplement (https://www.degruyterbrill.com/publication/isbn/9783110254273/downloadAsset/9783110254273_Inhaltsverzeichnis.pdf)
Supplement: Supplementary file 1 [file 9783110254273_Inhaltsverzeichnis.pdf]

# Inhaltsübersicht

## DRITTES BUCH

### Handelsbücher

§§

Zweiter Abschnitt. Ergänzende Vorschriften für Kapitalgesellschaften  
(Aktiengesellschaften, Kommanditgesellschaften auf Aktien und Gesellschaften  
mit beschränkter Haftung) sowie bestimmte Personenhandelsgesellschaften

Sechster Unterabschnitt. Straf- und Bußgeldvorschriften. Ordnungsgelder . . . 331–335b

Dritter Abschnitt. Ergänzende Vorschriften für eingetragene Genossen-  
schaften . . . . . 336–339

Vierter Abschnitt. Ergänzende Vorschriften für Unternehmen bestimmter  
Geschäftszweige . . . . . 340–341p

Erster Unterabschnitt. Ergänzende Vorschriften für Kreditinstitute und Finanz-  
dienstleistungsinstitute

Erster Titel. Anwendungsbereich . . . . . 340

Zweiter Titel. Jahresabschluß, Lagebericht, Zwischenabschluß . . . . . 340a–340d

Dritter Titel. Bewertungsvorschriften . . . . . 340e–340g

Vierter Titel. Währungsumrechnung . . . . . 340h

Fünfter Titel. Konzernabschluß, Konzernlagebericht, Konzernzwischen-  
abschluß . . . . . 340i–340j

Sechster Titel. Prüfung . . . . . 340k

Siebenter Titel. Offenlegung . . . . . 340l

Achter Titel. Straf- und Bußgeldvorschriften, Ordnungsgelder . . . . . 340m–340o

Zweiter Unterabschnitt. Ergänzende Vorschriften für Versicherungsunternehmen  
und Pensionsfonds

Erster Titel. Anwendungsbereich . . . . . 341

Zweiter Titel. Jahresabschluß, Lagebericht . . . . . 341a

Dritter Titel. Bewertungsvorschriften . . . . . 341b–341d

Vierter Titel. Versicherungstechnische Rückstellungen . . . . . 341e–341h

Fünfter Titel. Konzernabschluß, Konzernlagebericht . . . . . 341i–341j

Sechster Titel. Prüfung . . . . . 341k

Siebenter Titel. Offenlegung . . . . . 341l

Achter Titel. Straf- und Bußgeldvorschriften, Ordnungsgelder . . . . . 341m–341p

Fünfter Abschnitt. Privates Rechnungslegungsgremium. Rechnungslegungsbeirat 342–342a

Sechster Abschnitt. Prüfstelle für Rechnungslegung . . . . . 342b–342e
